# Supplementary material for: Peptide-triggered self-assembly of collagen mimetic peptides into nanospheres by electrostatic interaction and π–π stacking
Source: Royal Society of Chemistry journal article supplement (doi:10.1039/d3tb00088e), 2023-01-01
Supplement: d3tb00088e1.pdf [file d3tb00088e1.pdf]

## Supporting Materials

### Peptide-triggered Self-assembly of Collagen Mimetic Peptides into Microspheres by Electrostatic Interaction and $\pi$ - $\pi$ Stacking

Xiuxia Sun, Siqi Quan, Bo Wang, Qi Wang, Wenhua Li and Jianxi Xiao

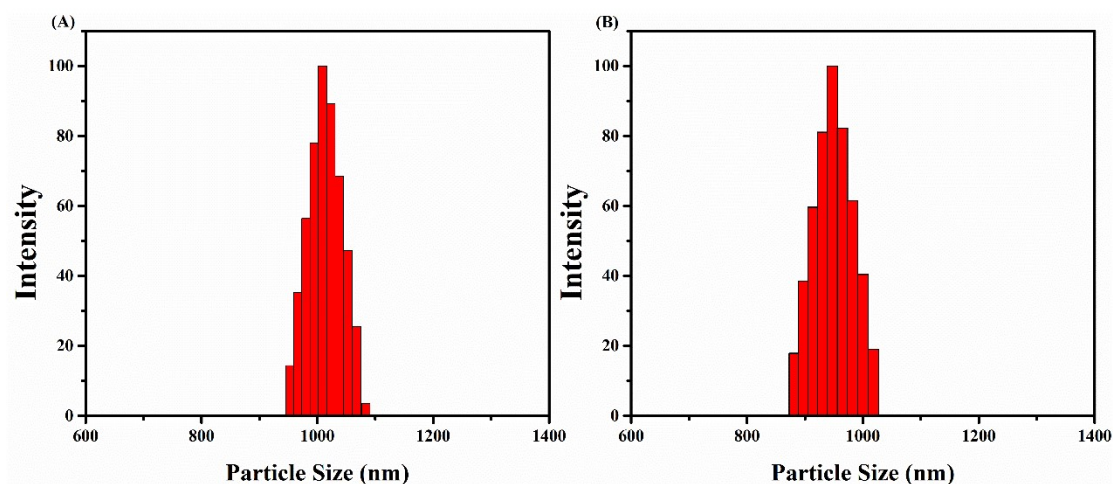

**Figure S1.** Average DLS size distribution of EOG-10-triggered collagen mimetic peptide FAM-PRG self-assembly (A) and EOG-10-triggered collagen mimetic peptide TPE-PRG self-assembly (B).

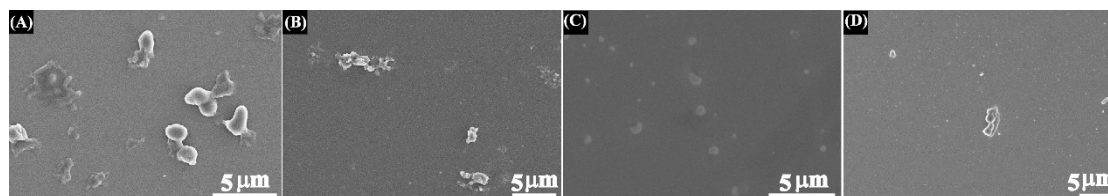

**Figure S2.** SEM images of TPE-PRG with EOG-10 assembled materials prepared at different pH values: pH 5.0 (A), pH 6.0 (B), pH 9.0 (C), pH 12.0 (D). Scale bar = 5  $\mu$ m.
